# Supplementary material for: Low levels of nitryl chloride at ground level: nocturnal nitrogen oxides in the Lower Fraser Valley of British Columbia
Source: Copernicus journal article supplement (doi:10.5194/acp-18-6293-2018), 2018-05-04
Supplement: Supplementary file 1 [file acp-18-6293-2018-supplement.pdf]

Supplement of Atmos. Chem. Phys., 18, 6293–6315, 2018  
<https://doi.org/10.5194/acp-18-6293-2018-supplement>  
© Author(s) 2018. This work is distributed under  
the Creative Commons Attribution 4.0 License.

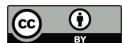

*Supplement of*

## **Low levels of nitryl chloride at ground level: nocturnal nitrogen oxides in the Lower Fraser Valley of British Columbia**

**Hans D. Osthoff et al.**

*Correspondence to:* Hans D. Osthoff (osthoff@ucalgary.ca)

The copyright of individual parts of the supplement might differ from the CC BY 4.0 License.

|    |                                                                                                                                                  |     |
|----|--------------------------------------------------------------------------------------------------------------------------------------------------|-----|
| 15 | <b>Table of contents</b>                                                                                                                         |     |
| 16 |                                                                                                                                                  |     |
| 17 | <b>Table S-1.</b> Volatile organic compounds quantified by GC-MS .....                                                                           | 3-4 |
| 18 | <b>Figure S-1.</b> Time series of gas-phase ammonia data reported by Metro Vancouver .....                                                       | 5   |
| 19 | Box model to rationalize O <sub>x</sub> loss by dry deposition .....                                                                             | 6   |
| 20 | <b>Table S-2.</b> Reactions included in box model to estimate dry deposition velocities .....                                                    | 6   |
| 21 | <b>Figure S-2.</b> Observed and simulated O <sub>x</sub> loss in the NBL at Abbotsford .....                                                     | 7   |
| 22 | <b>Figure S-3.</b> Effect of biogenic VOC emissions on O <sub>x</sub> .....                                                                      | 7   |
| 23 | <b>Figure S-4.</b> Comparison of observed and simulated NO mixing ratios .....                                                                   | 8   |
| 24 | Box model to determine the time necessary for NO <sub>3</sub> and N <sub>2</sub> O <sub>5</sub> to achieve a steady state with                   |     |
| 25 | respect to production and loss .....                                                                                                             | 9   |
| 26 | <b>Table S-3.</b> Reactions included in box model to estimate the time for NO <sub>3</sub> and N <sub>2</sub> O <sub>5</sub> to achieve          |     |
| 27 | steady state with respect to their production and loss .....                                                                                     | 10  |
| 28 | <b>Figure S-5.</b> Simulated temporal profiles of NO <sub>3</sub> and N <sub>2</sub> O <sub>5</sub> and O <sub>3</sub> and NO <sub>2</sub> ..... | 11  |
| 29 | <b>Figure S-6.</b> Equilibrium constants for reaction (2). .....                                                                                 | 12  |
| 30 | <b>Figure S-7.</b> Comparison of τ(N <sub>2</sub> O <sub>5</sub> ) calculated using equation (2) of the main manuscript. with                    |     |
| 31 | the dashed lines calculated using equation (11) of Brown et al. (2003) .....                                                                     | 12  |
| 32 | Estimates of how loss of NO <sub>3</sub> to VOCs would affect the lifetime of N <sub>2</sub> O <sub>5</sub> .....                                | 13  |
| 33 | <b>Figure S-8.</b> Same as Figure 8c but including an assumed NO <sub>3</sub> loss frequency to VOCs of                                          |     |
| 34 | 0.11 s <sup>-1</sup> .....                                                                                                                       | 13  |
| 35 | <b>References</b> .....                                                                                                                          | 14  |

36 **Table S-1.** Volatile organic compounds quantified by GC-MS

|                        |                        |                       |
|------------------------|------------------------|-----------------------|
| Butane, 2-methyl-      | Cyclohexane, methyl-   | Benzene, 1,2,3-       |
| 1-Pentene              | Pentane, 2,3,4-        | trimethyl-            |
| Pentane                | trimethyl-             | Benzene, 1,3-diethyl- |
| 2-Pentene (Z) (cis)    | Heptane, 2-methyl-     | Benzene, 1,4-diethyl- |
| Isoprene (1,3-         | Heptane, 3-methyl-     | Undecane              |
| Butadiene, 2-methyl-)  | Toluene                | Dodecane              |
| 2-Pentene (E) (trans)  | Octane                 | Ethylene              |
| Butane, 2,2-dimethyl-  | Ethylbenzene           | Acetylene             |
| Cyclopentane           | m & p-Xylene           | Ethane                |
| 2,3-Dimethylbutane     | Nonane                 | Propane               |
| Pentane, 2-methyl-     | Styrene                | Propylene             |
| Pentane, 3-methyl-     | o-Xylene               | Isobutane             |
| 1-Hexene               | Isopropyl Benzene      | 1-Butene              |
| Hexane                 | (Benzene, (1-methyleth | Butane                |
| Cyclopentane, methyl-  | Benzene, propyl-       | 2-Butene (trans)      |
| Pentane, 2,4-dimethyl- | Benzene, 1-ethyl-3-    | 2-Butene (cis)        |
| Cyclohexane            | methyl-                | Freon 11              |
| Hexane, 2-methyl-      | Benzene, 1-ethyl-4-    | (Trichloromonofluorom |
| Benzene                | methyl-                | ethane)               |
| 2,3-Dimethylpentane    | Benzene, 1,3,5-        | Isopropyl Alcohol     |
| Hexane, 3-methyl-      | trimethyl-             | Acetone               |
| Pentane, 2,2,4-        | Decane                 | Ethene, 1,1-dichloro- |
| trimethyl-             | Benzene, 1-ethyl-2-    | Methylene Chloride    |
| Heptane                | methyl-                | Freon 113 (Ethane,    |
|                        | Benzene, 1,2,4-        | 1,1,2-trichloro-1,2,2 |
|                        | trimethyl-             |                       |

|                                             |                                    |                                           |
|---------------------------------------------|------------------------------------|-------------------------------------------|
| Carbon disulfide                            | Methyl Methacrylate                | Benzene, 1,4-dichloro-                    |
| Ethene, 1,2-dichloro-,<br>(E)-              | 1-Propene, 1,3-<br>dichloro-, (Z)- | Benzene, 1,2-dichloro-                    |
| Methyl tertbutylether<br>(Propane, 2-methox | Methyl Isobutyl Ketone             | Benzene, 1,2,4-<br>trichloro-             |
| Ethane, 1,1-dichloro-                       | 1-Propene, 1,3-<br>dichloro-, (E)- | 1,3-Butadiene,<br>1,1,2,3,4,4-hexachloro- |
| Vinyl Acetate (Acetic<br>acid ethenyl ester | Ethane, 1,1,2-trichloro-           | Naphthalene                               |
| 2-Butanone                                  | 2-Hexanone                         | Freon 12                                  |
| Chloroform<br>(Trichloromethane)            | Methane,<br>dibromochloro-         | Chloromethane                             |
| Ethyl Acetate                               | Ethane, 1,2-dibromo-               | Freon 114                                 |
| Furan, tetrahydro-                          | Tetrachloroethylene                | Vinyl chloride                            |
| Ethane, 1,2-dichloro-                       | Benzene, chloro-                   | 1,3 Butadiene                             |
| Ethane, 1,1,1-trichloro-                    | Bromoform (Methane,<br>tribromo-)  | Bromomethane                              |
| Carbon Tetrachloride                        | Ethane, 1,1,2,2-<br>tetrachloro-   | Chloroethane                              |
| Trichloroethylene                           | Ethane, pentachloro-               | Ethanol                                   |
| Methane,<br>bromodichloro-                  | Benzyl Chloride                    | 1R-alpha-Pinene                           |
| 1,4-Dioxane                                 | Benzene, 1,3-dichloro-             | Camphene                                  |
|                                             |                                    | beta-Pinene                               |
|                                             |                                    | D-Limonene                                |

37

39

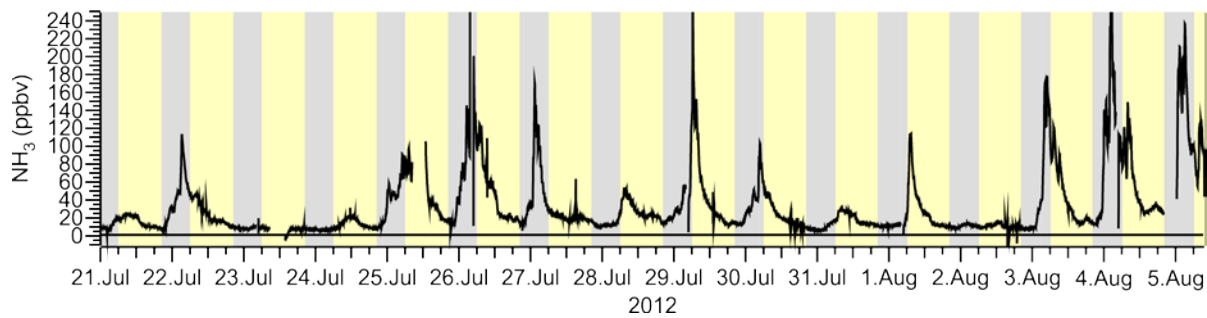

40

41 **Figure S-1.** Time series of gas-phase ammonia data reported by Metro Vancouver. Data were  
42 not quality-assured and are non-quantitative.

43

44 **Box model to rationalize O<sub>x</sub> loss by dry deposition**

45 A box model was set up to simulate the median nocturnal decays of O<sub>3</sub> and O<sub>x</sub>. These  
46 simulations are intended as back-of-the-envelope type estimates of major processes only since  
47 an accurate description of the nocturnal boundary layer chemistry would require modeling of  
48 horizontal and vertical transport, i.e., altitude-resolved information (Geyer and Stutz, 2004).  
49 Such information was not available in this work.

50 The reactions used in this model are summarized in Table S-2. The mechanism consists of O<sub>3</sub>  
51 and NO<sub>2</sub> dry deposition, titration of NO with O<sub>3</sub> (R8) and chemical loss of O<sub>3</sub> to a generic  
52 biogenic hydrocarbon. For dry deposition, the velocities of  $v_d(\text{O}_3) = 0.2 \text{ cm s}^{-1}$  and  $v_d(\text{NO}_2) =$   
53  $\alpha \times v_d(\text{O}_3)$  with  $\alpha=0.65$  from Lin et al. (2010) were used. The rate constants for reaction with  
54 the generic biogenic hydrocarbon was set to that of  $\alpha$ -pinene with O<sub>3</sub> ( $5 \times 10^{-11} \text{ cm}^3 \text{ molec.}^{-1} \text{ s}^{-1}$ ,  
55 (Seinfeld and Pandis, 2006)).

56 Model simulations were carried out using a custom differential equation integrator macro in the  
57 software package Igor Pro (Wavemetrics) and were initiated with the campaign median NO<sub>2</sub>  
58 and O<sub>3</sub> concentrations observed at sunset.

59

60 **Table S-2.** Reactions included in box model to estimate dry deposition velocities

| Reaction                                               | Rate constant                                         |
|--------------------------------------------------------|-------------------------------------------------------|
| O <sub>3</sub> → products                              | $k_{\text{dep}}(\text{O}_3)$                          |
| NO <sub>2</sub> → products                             | $k_{\text{dep}}(\text{NO}_2)$                         |
| O <sub>3</sub> + NO → NO <sub>2</sub> + O <sub>2</sub> | $4.8 \times 10^{-4} \text{ ppbv}^{-1} \text{ s}^{-1}$ |
| O <sub>3</sub> + VOC → products                        | $1.25 \text{ ppbv}^{-1} \text{ s}^{-1}$               |

61

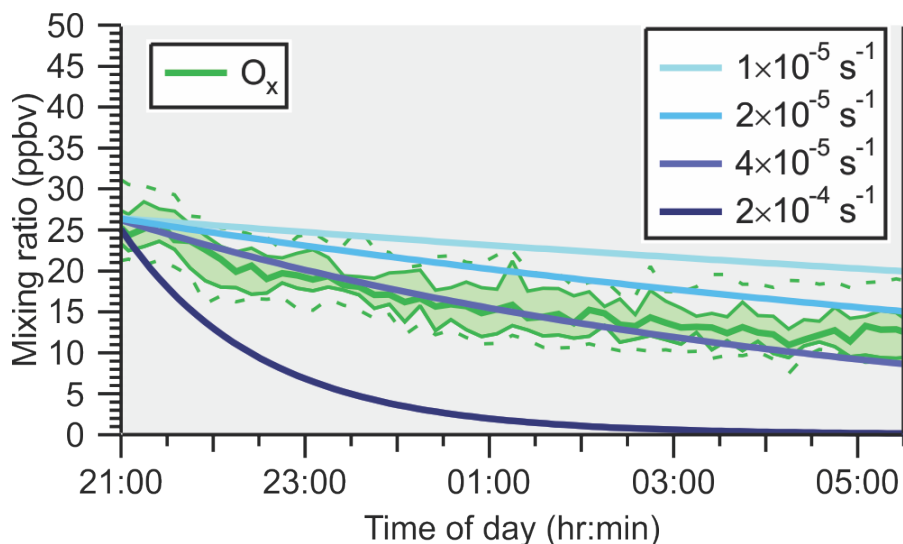

62  
 63 **Figure S-2.** Observed and simulated  $O_x$  loss in the NBL at Abbotsford assuming  $O_3$  dry  
 64 deposition rates of  $2 \times 10^{-4} \text{ s}^{-1}$ ,  $4 \times 10^{-5} \text{ s}^{-1}$ ,  $2 \times 10^{-5} \text{ s}^{-1}$  and  $1 \times 10^{-5} \text{ s}^{-1}$ , corresponding to approximate  
 65 mixing heights of 10 m, 50 m, 100 m, and 200 m.

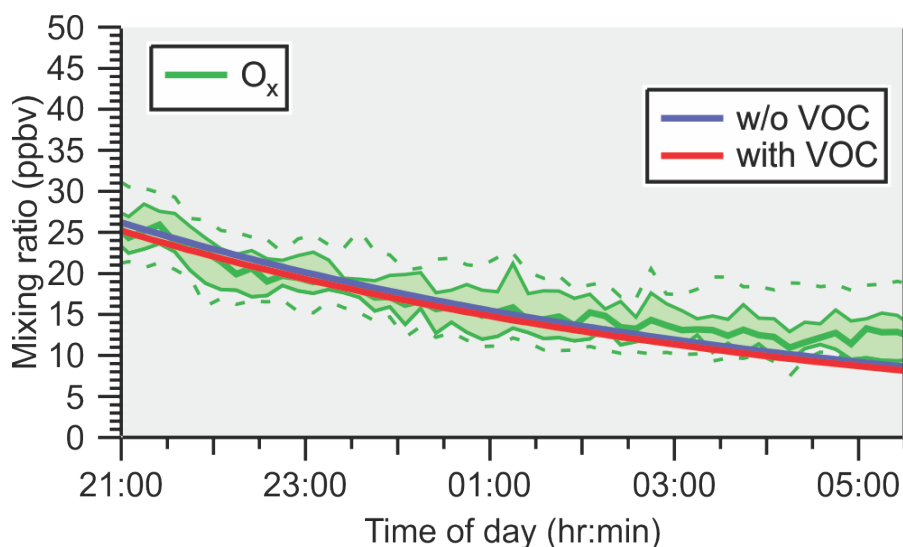

67  
 68 **Figure S-3.** Effect of biogenic VOC emissions on  $O_x$ . The observed and simulated  $O_x$  loss in  
 69 the NBL at Abbotsford assuming an  $O_3$  dry deposition rate of  $4 \times 10^{-5} \text{ s}^{-1}$  are shown as green  
 70 and blue traces, respectively. The red trace shows the effect of adding 1 ppbv of reactive  
 71 biogenic VOC at sunset and continuous biogenic VOC emissions of  $3 \times 10^5 \text{ molecules cm}^{-3} \text{ s}^{-1}$   
 72 throughout the night.

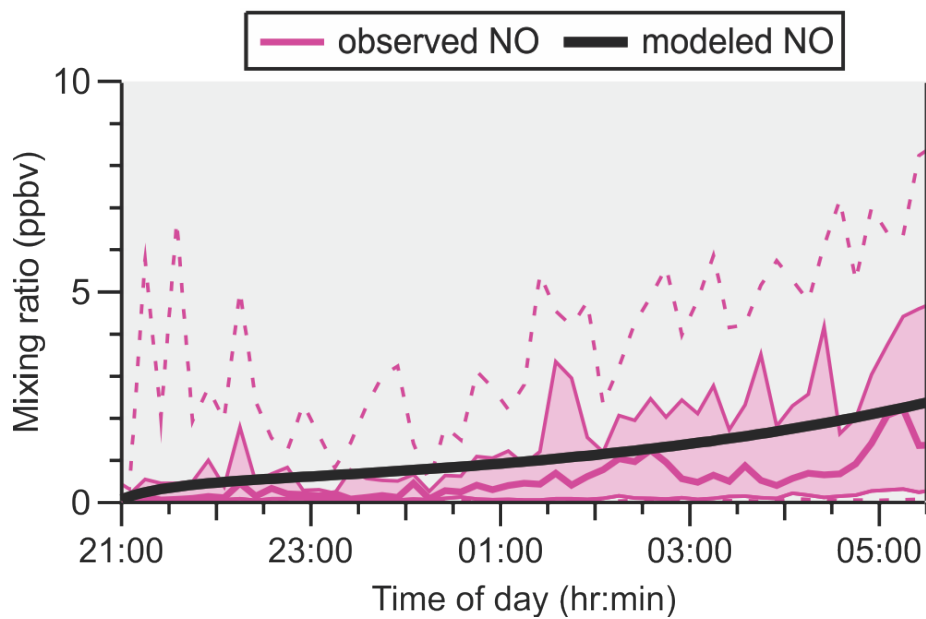

74

75 **Figure S-4.** Comparison of observed and simulated NO mixing ratios after constant emissions  
 76 of  $2.9 \times 10^{-4}$  ppbv  $s^{-1}$  ( $\sim 1.05$  ppbv  $hr^{-1}$ ) of NO and  $3 \times 10^{-5}$  ppbv  $s^{-1}$  ( $\sim 0.05$  ppbv  $hr^{-1}$ ) of NO<sub>2</sub> were  
 77 added.

78



79 **Box model to determine the time necessary for NO<sub>3</sub> and N<sub>2</sub>O<sub>5</sub> to achieve a steady state**  
80 **with respect to production and loss**

81 The validity of the steady state assumption was evaluated in a similar fashion as described by  
82 Brown et al. (2003) using a simple box model. Reactions and rate coefficients included in these  
83 simulations are listed in Table S-3. Model simulations were carried out using a custom  
84 differential equation integrator macro in the software package Igor Pro (Wavemetrics). Rate  
85 coefficients were calculated for a temperature of 286 K, which is the median nocturnal  
86 temperature of this study (Figure 8B). Simulations were initiated with the median nocturnal  
87 NO<sub>2</sub> and O<sub>3</sub> mixing ratios of 7.5 ppbv (1.92×10<sup>11</sup> molecules cm<sup>-3</sup>) and of either 18 ppbv  
88 (4.5×10<sup>11</sup> molecules cm<sup>-3</sup>) or 5.0 ppbv (1.3×10<sup>11</sup> molecules cm<sup>-3</sup>), respectively. The simulations  
89 assume pseudo-first order N<sub>2</sub>O<sub>5</sub> and NO<sub>3</sub> loss with frequencies of 1×10<sup>-3</sup> s<sup>-1</sup> and between  
90 1×10<sup>-2</sup> s<sup>-1</sup> and 0 s<sup>-1</sup>, respectively.

91 Simulated temporal profiles of NO<sub>3</sub> and N<sub>2</sub>O<sub>5</sub> are show in Figure S-5 (left axis) and those of O<sub>3</sub>  
92 and NO<sub>2</sub> on the right axis. The subpanels A, B, and C are simulations with k<sub>NO<sub>3</sub></sub> = 0 s<sup>-1</sup>, 1×10<sup>-3</sup>  
93 s<sup>-1</sup> or 1×10<sup>-2</sup> s<sup>-1</sup>, respectively. In each case, the rate of change of [N<sub>2</sub>O<sub>5</sub>] with respect to time,  
94 d[N<sub>2</sub>O<sub>5</sub>]/dt, approaches zero after a period of ~70 min, or less, indicating the time to approach  
95 steady state. The simulations also show that the amount of O<sub>3</sub> and NO<sub>2</sub> removed through  
96 chemical reactions of NO<sub>3</sub> and N<sub>2</sub>O<sub>5</sub> are ~1 ppbv and between ~1.9 and ~1.6 ppbv over a period  
97 of 4 hours. These are upper limits as in this study much of the NO<sub>3</sub> was titrated by NO. In any  
98 case, loss of O<sub>3</sub> through nocturnal gas-phase is predicted to be rather small compared to the  
99 total O<sub>3</sub> loss observed (~26 ppbv over 9 hours, see section 3.1.3 and Figure 4C in the main text).  
100 Brown et al. (2003) show that in these scenarios, NO<sub>3</sub>, N<sub>2</sub>O<sub>5</sub>, and NO<sub>2</sub> remain in equilibrium  
101 almost throughout; for completeness, the corresponding plot for these simulations is shown in  
102 Figure S-6.

103 As shown in equation (2) of the manuscript, the steady state lifetime is approximately equal to:

104 
$$\frac{[N_2O_5]}{k_1[NO_2][O_3]} \approx \left( k_{N_2O_5} + \frac{k_{NO_3}}{K_2[NO_2]} \right)^{-1} \quad (2)$$

105 A comparison of these two expressions is shown in Figure S-7. The time when these two  
106 expressions are equal is equal to the time to steady state.

107 **Table S-3.** Reactions included in the box model to estimate the time for NO<sub>3</sub> and N<sub>2</sub>O<sub>5</sub> to  
 108 achieve steady state with respect to their production and loss  
 109

| #               | Reaction                                                            | Rate coefficient                                                                                                                 |
|-----------------|---------------------------------------------------------------------|----------------------------------------------------------------------------------------------------------------------------------|
| R1              | NO <sub>2</sub> + O <sub>3</sub> → NO <sub>3</sub> + O <sub>2</sub> | 2.28×10 <sup>-17</sup> cm <sup>3</sup> molecule <sup>-1</sup> s <sup>-1</sup>                                                    |
| R2 <sub>f</sub> | NO <sub>3</sub> + NO <sub>2</sub> → N <sub>2</sub> O <sub>5</sub>   | 1.35×10 <sup>-12</sup> cm <sup>3</sup> molecule <sup>-1</sup> s <sup>-1</sup>                                                    |
| R2 <sub>r</sub> | N <sub>2</sub> O <sub>5</sub> → NO <sub>3</sub> + NO <sub>2</sub>   | 0.00923 s <sup>-1</sup>                                                                                                          |
| (R7)            | NO <sub>3</sub> → products                                          | k <sub>x</sub> = k <sub>NO3</sub> = 0 s <sup>-1</sup> , 1×10 <sup>-3</sup> s <sup>-1</sup> or 1×10 <sup>-2</sup> s <sup>-1</sup> |
| (R5)            | N <sub>2</sub> O <sub>5</sub> → products                            | k <sub>y</sub> = k <sub>N2O5</sub> = 1×10 <sup>-3</sup> s <sup>-1</sup>                                                          |

110

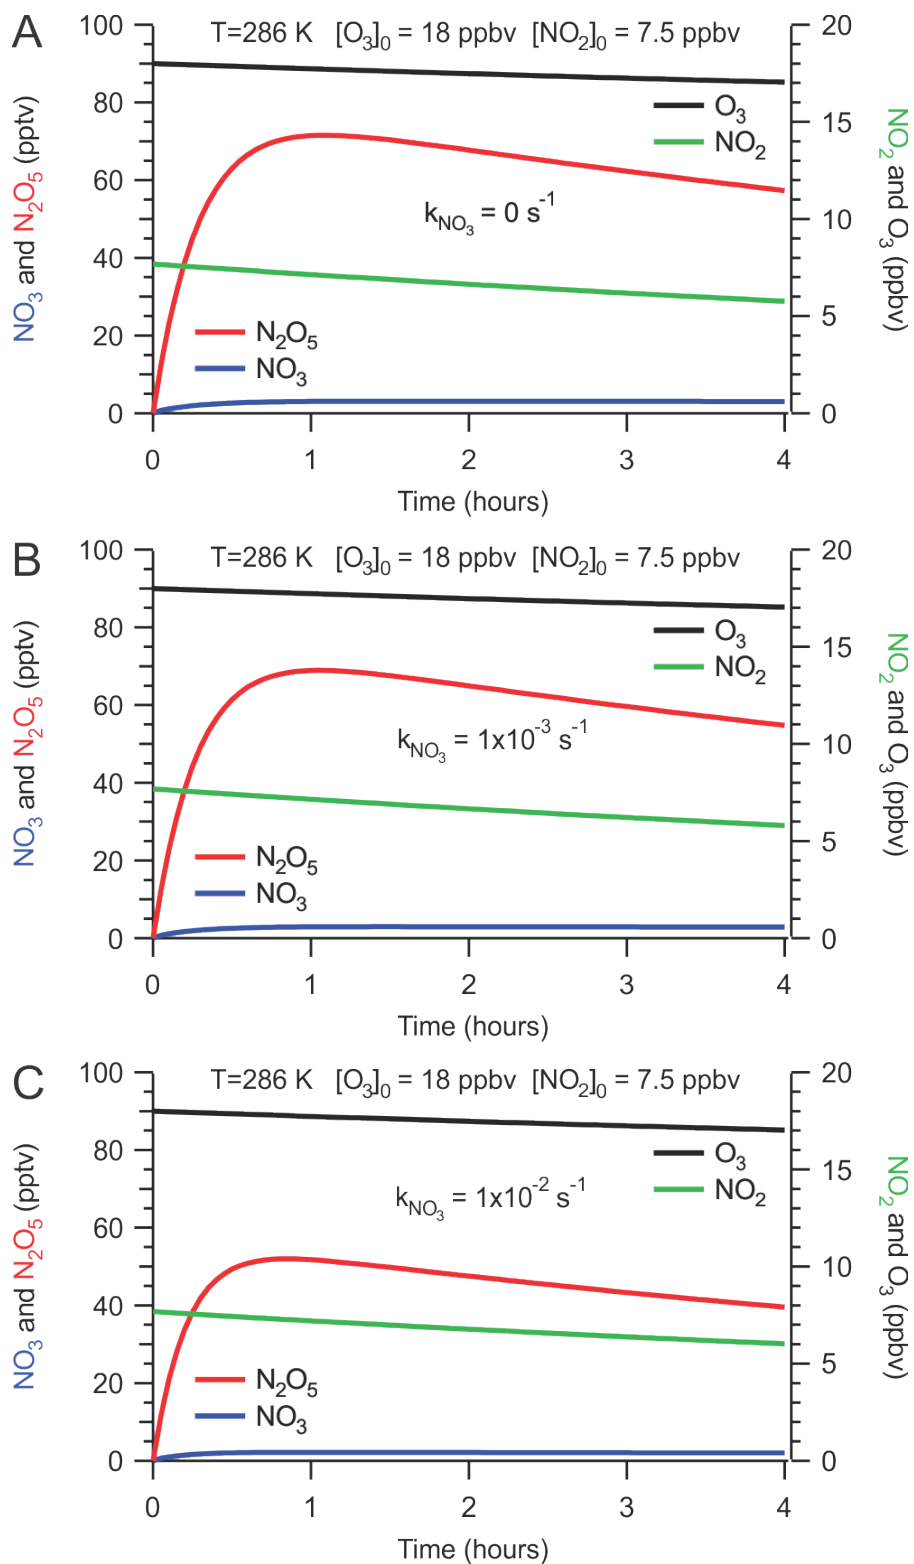

111  
 112 **Figure S-5.** Simulated temporal profiles of  $\text{NO}_3$  and  $\text{N}_2\text{O}_5$  (left axis) and  $\text{O}_3$  and  $\text{NO}_2$  (right  
 113 axis). The subpanels A, B, and C are simulations with  $k_{\text{NO}_3} = 0 \text{ s}^{-1}$ ,  $1 \times 10^{-3} \text{ s}^{-1}$  or  $1 \times 10^{-2} \text{ s}^{-1}$ ,  
 114 respectively.

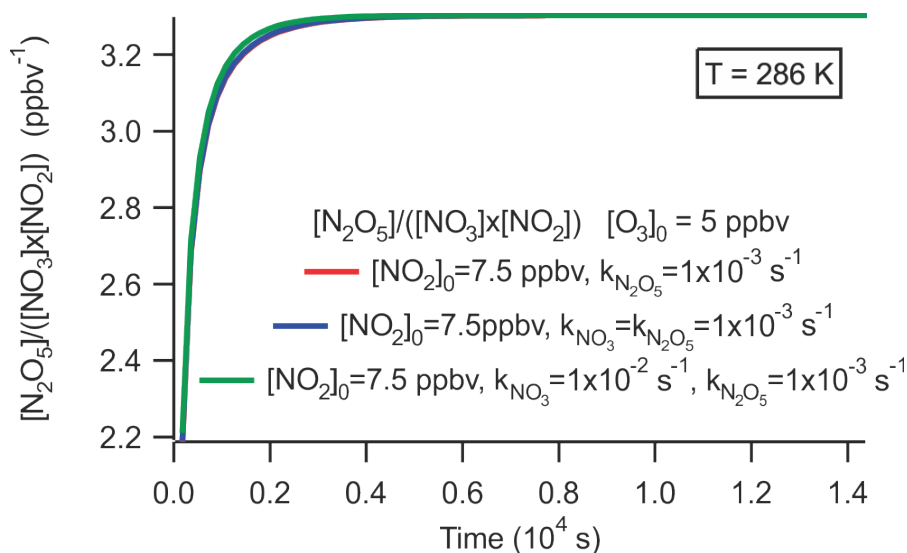

115  
 116 **Figure S-6.** Equilibrium constants for reaction (2) calculated for the three scenarios shown in  
 117 Figure S-5.

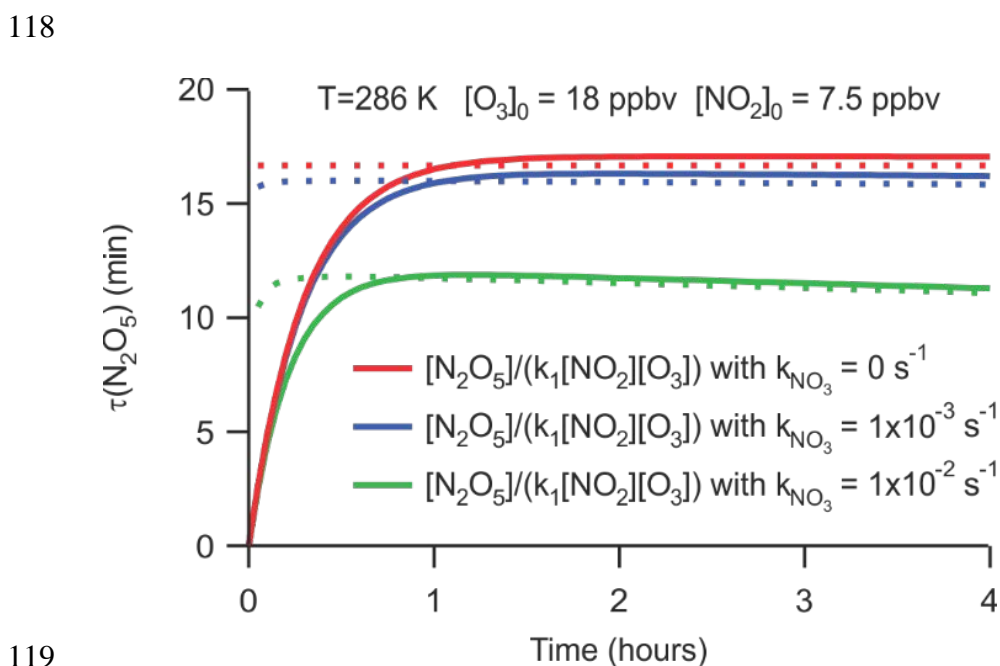

119  
 120 **Figure S-7.** Comparison of  $\tau(\text{N}_2\text{O}_5)$  calculated using equation (2) of the main manuscript, with  
 121 the dashed lines calculated using equation (11) of Brown et al. (2003).  
 122

123 **Estimates of how loss of NO<sub>3</sub> to VOCs would affect the lifetime of N<sub>2</sub>O<sub>5</sub>**

124 The steady state lifetime calculation presented in Figure 8C of the main manuscript neglects  
 125 losses of NO<sub>3</sub> to VOCs due to poor data coverage, i.e., presents a scenario where  
 126  $\Sigma k_{\text{NO}_3+\text{VOC},i}[\text{VOC}]_i$  is assumed to be zero, which is, of course, unrealistic.

127 We used all available VOC data and calculated a time series of  $\Sigma k_{\text{NO}_3+\text{VOC},i}[\text{VOC}]_i$ . The average  
 128 ( $\pm 1 \sigma$ ) value at night is  $(0.038 \pm 0.026) \text{ s}^{-1}$ . The N<sub>2</sub>O<sub>5</sub> loss frequency, calculated by dividing this  
 129 value with the N<sub>2</sub>O<sub>5</sub>:NO<sub>3</sub> ratio, is  $(1.1 \pm 0.9) \times 10^{-5} \text{ s}^{-1}$ , corresponding to a lifetime of ~2.5 hours,  
 130 which is negligible.

131 However, as stated in the main manuscript, the VOC data coverage is sparse and did not include  
 132 measurements of all hydrocarbons towards which NO<sub>3</sub> is reactive. Recently, Liebmann et al.  
 133 (2018) reported an average of nocturnal NO<sub>3</sub> loss frequency of  $0.11 \text{ s}^{-1}$  in the boreal forest of  
 134 Finland. This value likely included loss of NO<sub>3</sub> to NO and a variety of hydrocarbons such as  
 135 sesqui- and diterpenes, which are likely present in higher concentration in a boreal forest than  
 136 at Abbotsford and hence represents an upper limit Taking this value and dividing it by the  
 137 N<sub>2</sub>O<sub>5</sub>:NO<sub>3</sub> ratio, the average nocturnal N<sub>2</sub>O<sub>5</sub> loss frequency via NO<sub>3</sub>-VOC reactions is  
 138 calculated to  $(5.6 \pm 1.3) \times 10^{-3} \text{ s}^{-1}$ . Figure S-8 shows the result of including this value in the  
 139 calculation of N<sub>2</sub>O<sub>5</sub> lifetime.

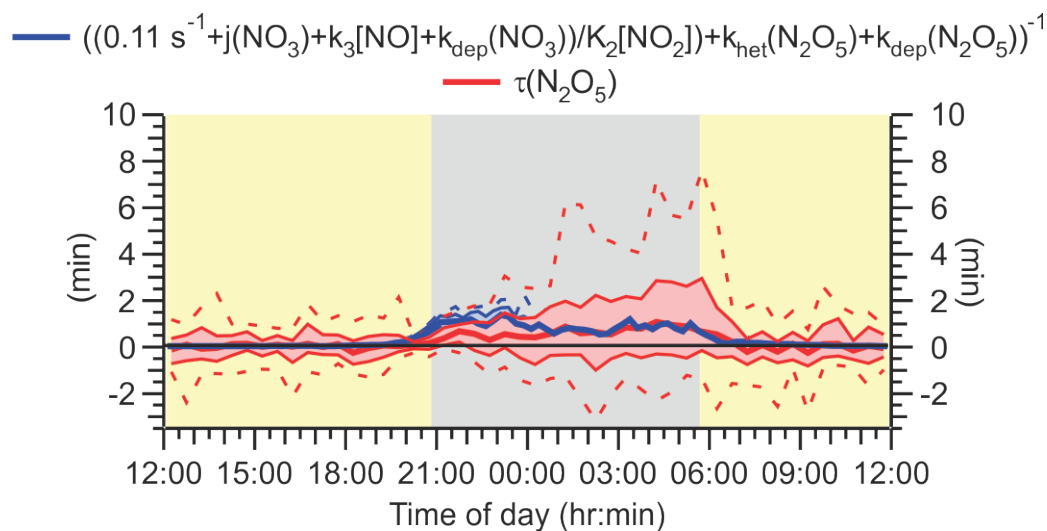

140  
 141 **Figure S-8.** Same as Figure 8c but including an assumed NO<sub>3</sub> loss frequency to VOCs of 0.11  
 142 s<sup>-1</sup>.

143 **References**

144 Brown, S. S., Stark, H., and Ravishankara, A. R.: Applicability of the steady state  
145 approximation to the interpretation of atmospheric observations of NO<sub>3</sub> and N<sub>2</sub>O<sub>5</sub>, *J. Geophys.*  
146 *Res.*, 108, 4539, 10.1029/2003JD003407, 2003.

147 Geyer, A., and Stutz, J.: Vertical profiles of NO<sub>3</sub>, N<sub>2</sub>O<sub>5</sub>, O<sub>3</sub>, and NO<sub>x</sub> in the nocturnal boundary  
148 layer: 2. Model studies on the altitude dependence of composition and chemistry, *J. Geophys.*  
149 *Res.*, 109, D12307, doi:10.1029/2003JD004211, 2004.

150 Liebmann, J., Karu, E., Sobanski, N., Schuladen, J., Ehn, M., Schallhart, S., Quéléver, L.,  
151 Hellen, H., Hakola, H., Hoffmann, T., Williams, J., Fischer, H., Lelieveld, J., and Crowley, J.  
152 N.: Direct measurement of NO<sub>3</sub> radical reactivity in a boreal forest, *Atmos. Chem. Phys.*, 18,  
153 3799-3815, 10.5194/acp-18-3799-2018, 2018.

154 Lin, C. H., Lai, C. H., Wu, Y. L., and Chen, M. J.: Simple model for estimating dry deposition  
155 velocity of ozone and its destruction in a polluted nocturnal boundary layer, *Atmos. Environ.*,  
156 44, 4364-4371, 10.1016/j.atmosenv.2010.07.053, 2010.

157 Seinfeld, J. H., and Pandis, S. N.: *Atmospheric chemistry and physics: from air pollution to*  
158 *climate change*, 2<sup>nd</sup> ed., Wiley, Hoboken, N.J., 2006.

159

160
